# Supplementary material for: Full-term mouse development by abolishing Zn2+-dependent metaphase II arrest without Ca2+ release
Source: Oxford University Press journal article supplement (doi:10.1242/dev.049791), 2010-06-30
Supplement: dev049791tables1.pdf [file dev049791tables1.pdf]

**Table S1. Zn<sup>2+</sup> dissociation constants (K<sub>d</sub>) for Zn<sup>2+</sup>-binding reagents used**

| Reagent                                 | K <sub>d</sub> (M)    |
|-----------------------------------------|-----------------------|
| TPEN                                    | $2.6 \times 10^{-16}$ |
| FluoZin-3 AM                            | $1.5 \times 10^{-8}$  |
| RhodZin-3 AM                            | $6.5 \times 10^{-8}$  |
| Newport Green DCF (permeant ester form) | $1.0 \times 10^{-6}$  |
| ZnAF-2 DA                               | $2.7 \times 10^{-9}$  |
