# Supplementary figures and images for: Full-term mouse development by abolishing Zn2+-dependent metaphase II arrest without Ca2+ release
Source: Oxford University Press journal article supplement (doi:10.1242/dev.049791), 2010-06-30

**A**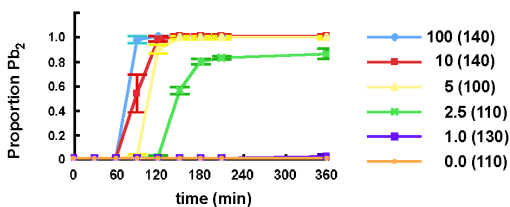**B**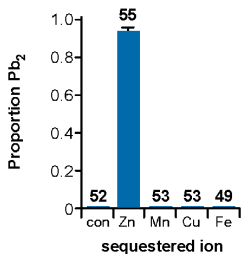**C**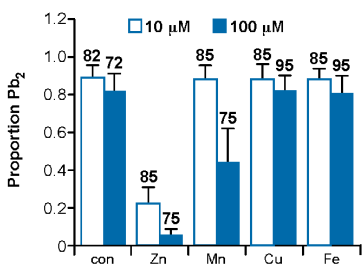**D**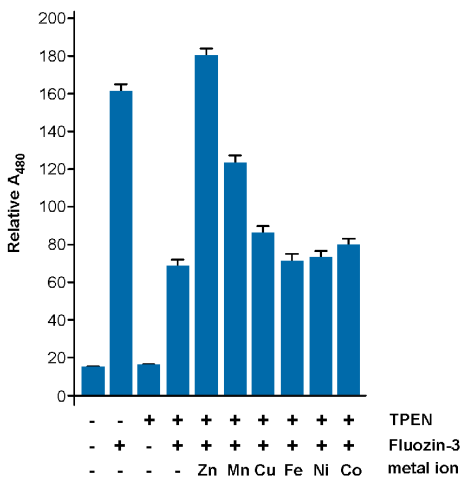

Supplement: dev049791-sup-049791figs1.pdf [file dev049791-sup-049791figs1.pdf]

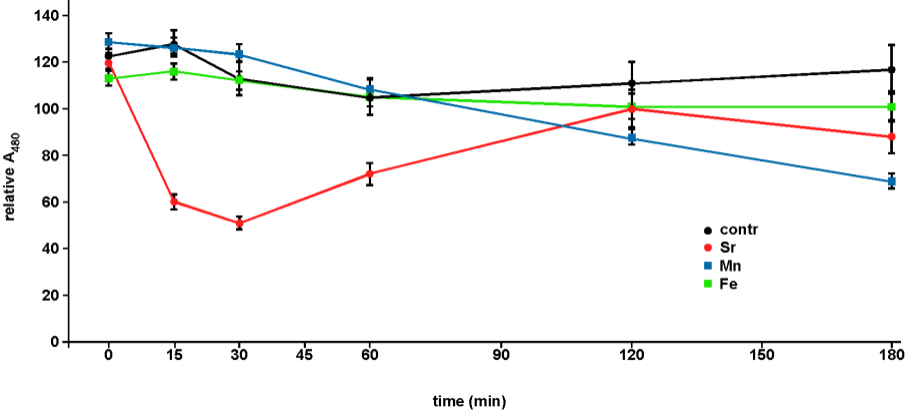

Supplement: dev049791-sup-049791figs2.pdf [file dev049791-sup-049791figs2.pdf]

**A**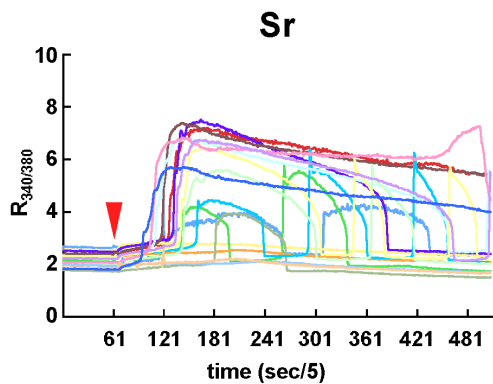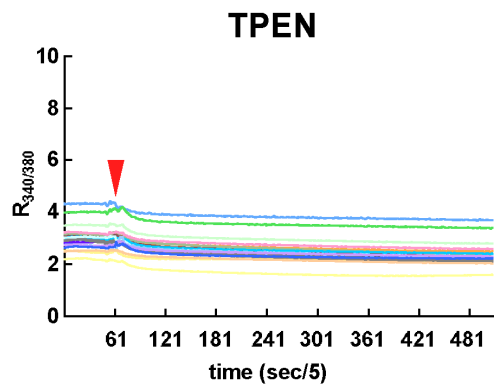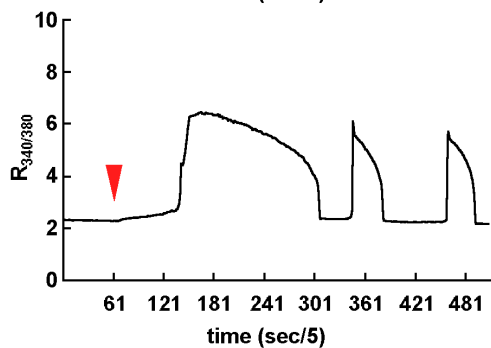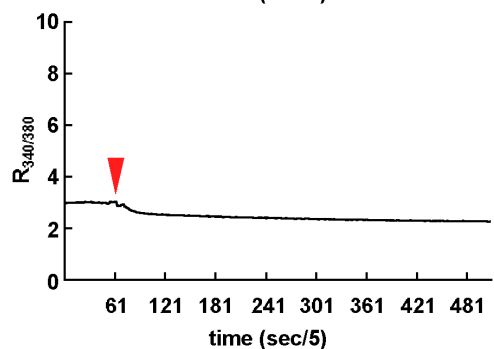**B**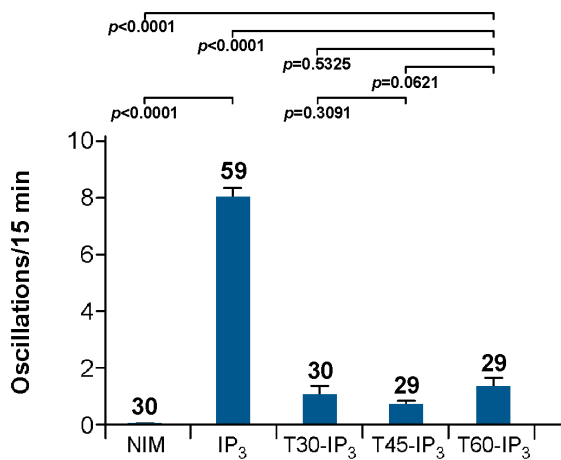**C**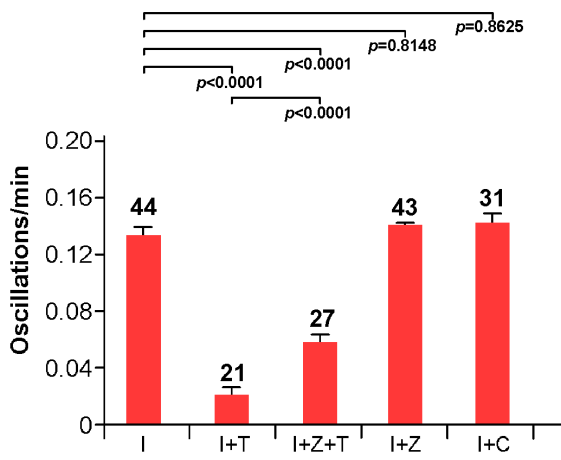

Supplement: dev049791-sup-049791figs3.pdf [file dev049791-sup-049791figs3.pdf]
